# Supplementary figures and images for: The Maternal Milk Microbiome in Mammals of Different Types and Its Potential Role in the Neonatal Gut Microbiota Composition
Source: MDPI journal article supplement (doi:10.3390/ani11123349), 2021-11-23

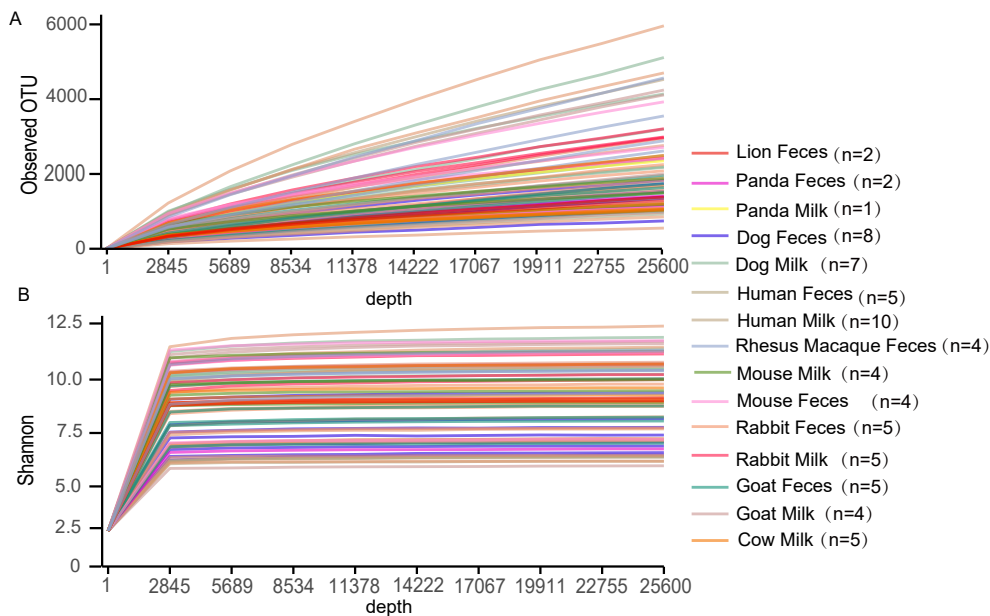

Supplement: s1 [file s1]

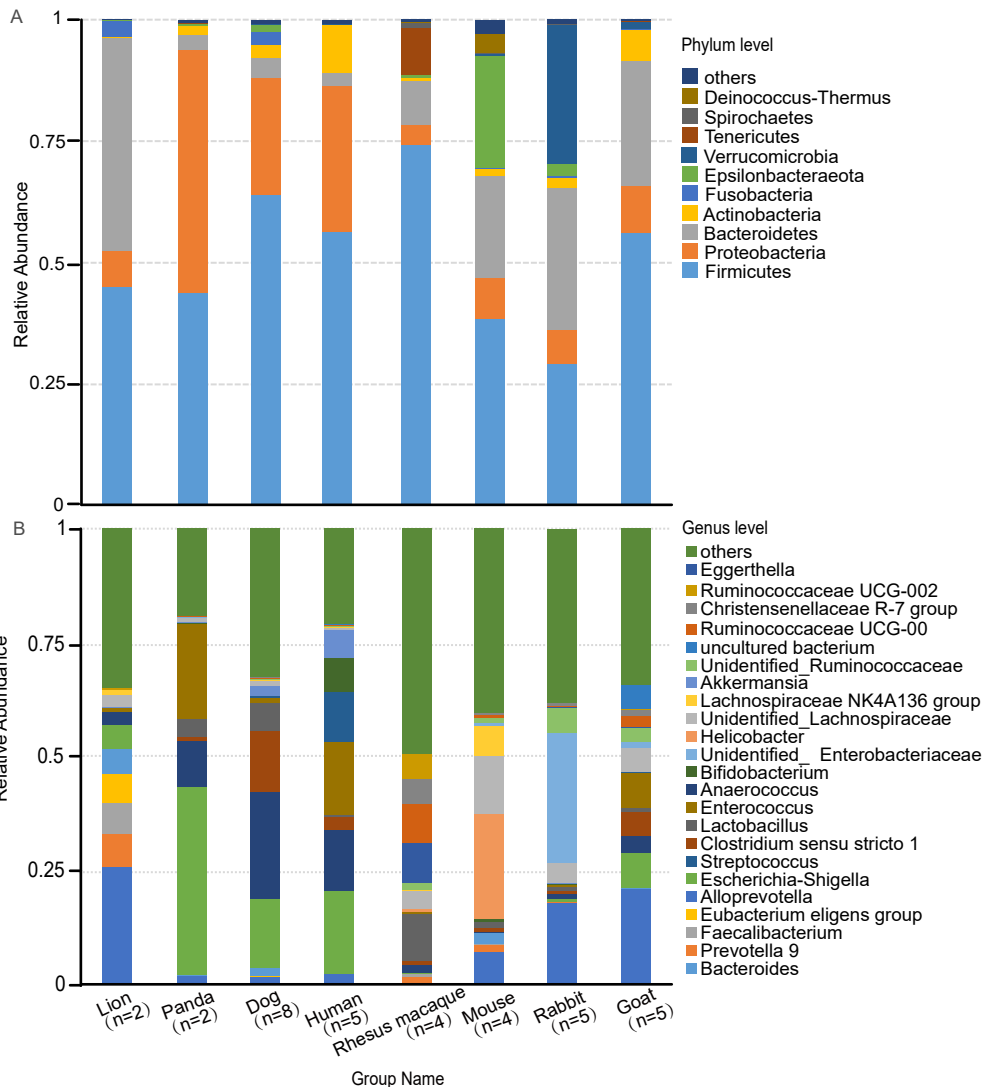

Supplement: s1 [file s1]

A

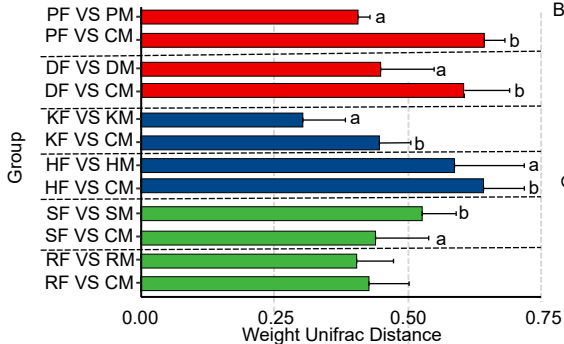

B

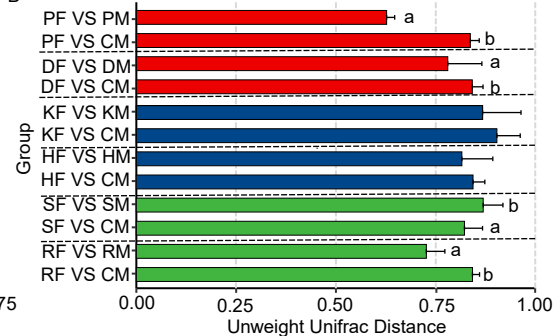

Supplement: s1 [file s1]

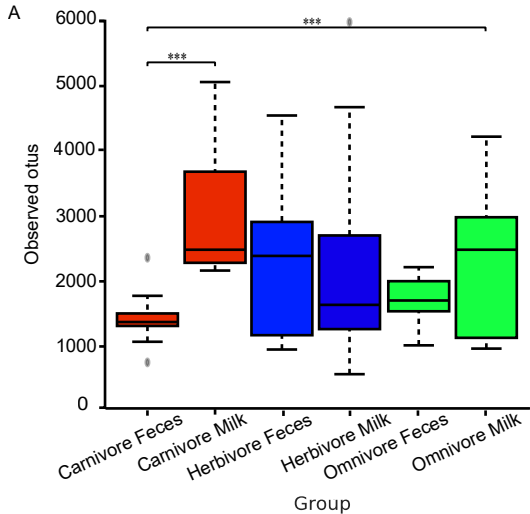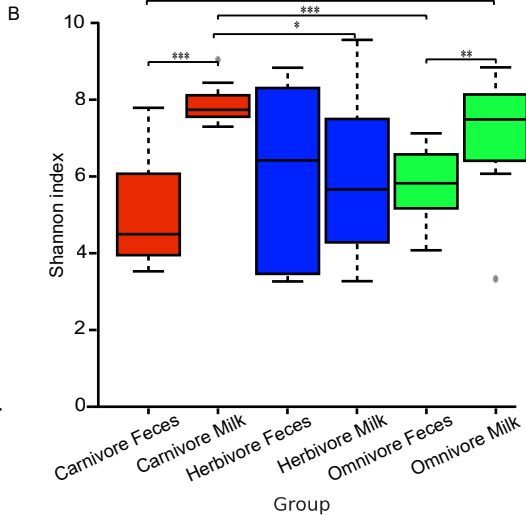

Supplement: s1 [file s1]
